# Supplementary material
Source: publisher figshare collection journal article supplement (https://acs.figshare.com/ndownloader/files/4497241)
Supplement: Supplementary file 1 [file 4497241]

## **SUPPORTING INFORMATION**

Schematic diagrams of the three sites where this study was conducted, showing the positions of the sampling instruments relative to the energised powerlines is provided in the supporting information section. Also included in this section is a graphical representation of the mean net particle charge concentration and dc e-field as a function of wind direction measured 50 m downwind of powerline (Figure S2). Figure S3 gives a temporal variation pattern of aerosol particle charge and particle number concentration levels.

Figures S1a, S1b and S1c are schematic diagram of the sampling site and the position of the sampling instruments relative to the energised powerlines.

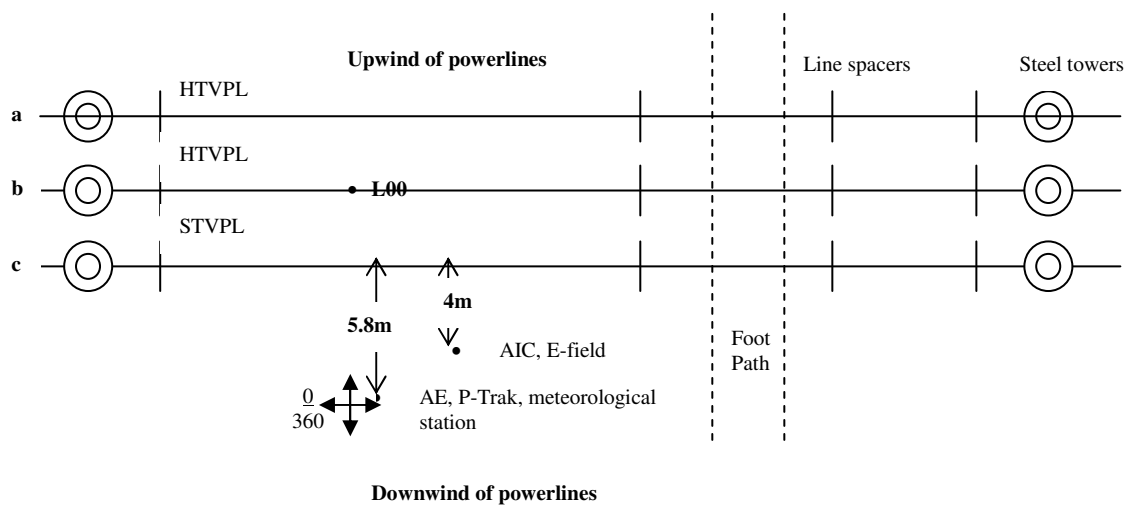

**Figure S1a: Sampling site A (not to scale)**

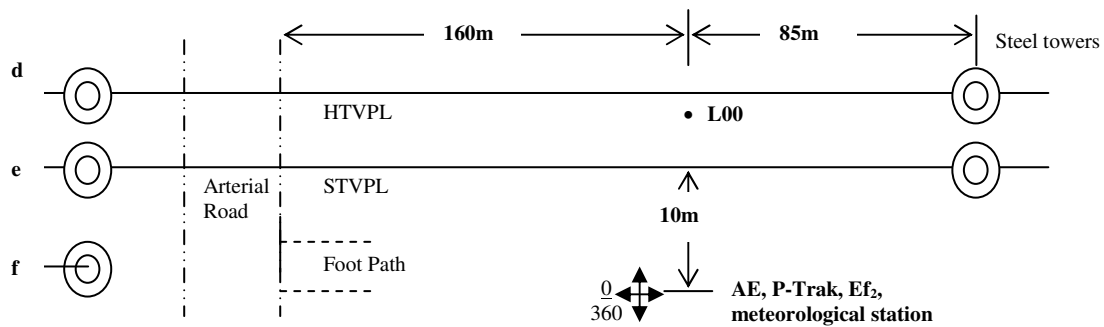

**Figure S1b: Sampling site B - (not to scale)**

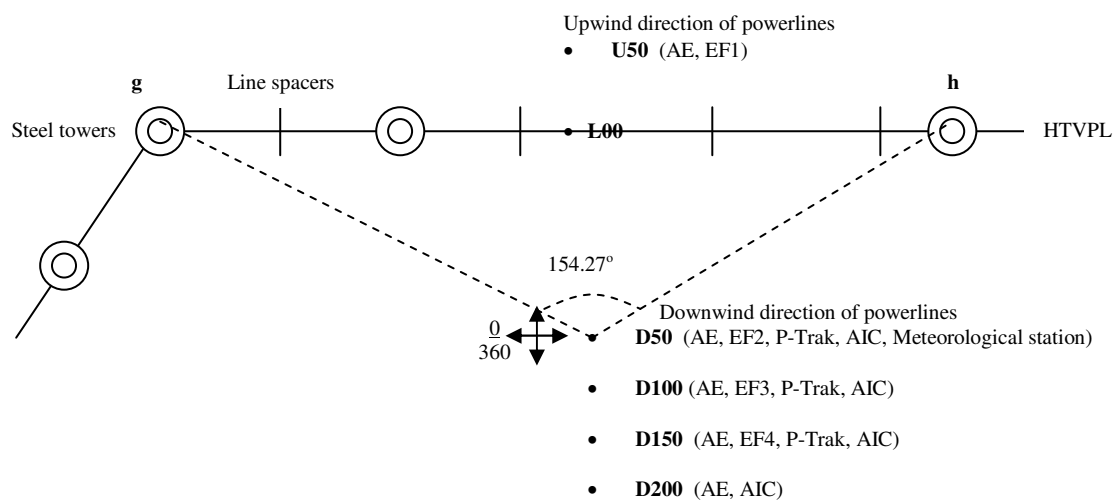

**Figure S1c:** Sampling site C (not to scale). ‘U50’ refers to the upwind point 50 m from the line. Similarly, ‘D’ refers to the downwind points.

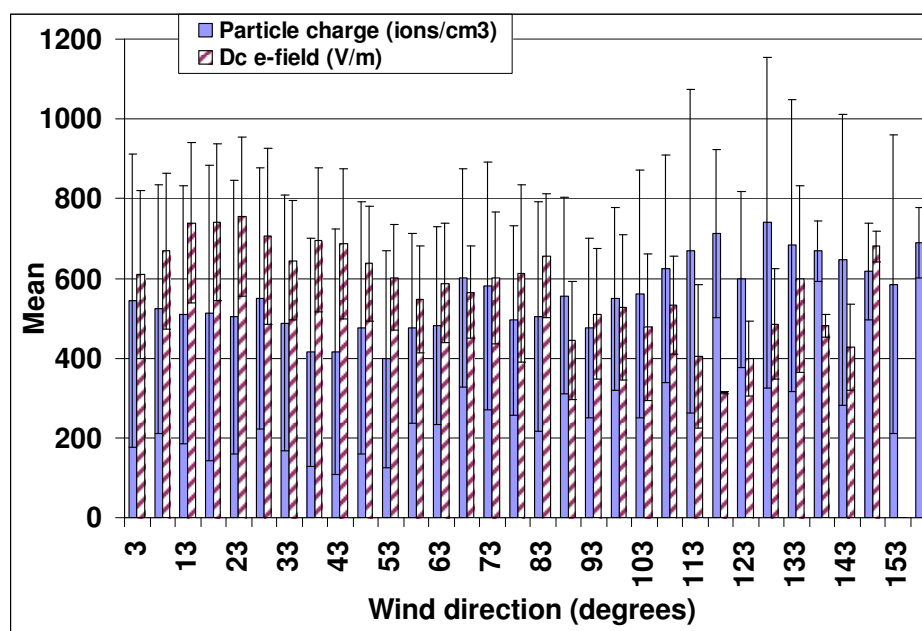

**Figure S2:** Mean net particle charge concentration and dc e-field as a function of wind direction measured at D50 when the wind was blowing normal to the lines.

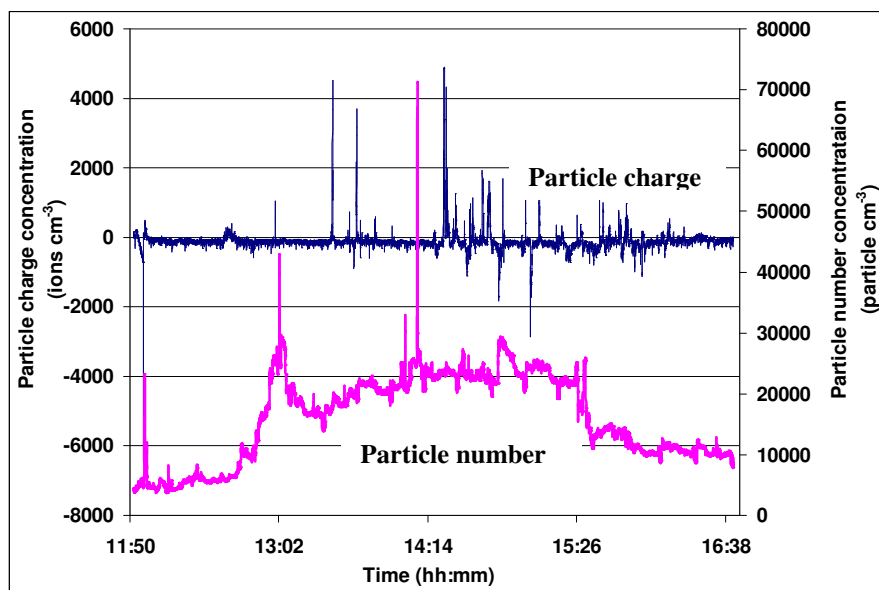

Figure S3: Temporal variation of aerosol particle charge and particle number concentration.
